# Supplementary material
Source: PubMed Central journal article supplement (PMC11237385)
Supplement: jcm.00243-24-s0001.pdf [file jcm.00243-24-s0001.pdf]

CCTGCAGGCTAGGAGGCAATTGTTAATACGACTCACTATAGAGAGTTTGC AAAATATACAGGGGATTATATATAATGGAAAAACAAGAAA  
GGAAAAATAGGAGGTTTATCATATGAACGGACCGATTATAATGACTAGAGAAGAGCGTATGAAAAATAGTACATGAAATAAAAGAGAGAAT  
ATTAGACAAATATGGTGACGACGTGAAAGCTATTGGAGTGTATGGCTCTCTATGTAGCAATATTACGACCTGGAGGGAAAAGTTATCAG  
GCATGCACCTGGTAGCTAGTCTTTAAACCAATAGATTGCATCGGTTTAAAAGGCAAGACCGTCAAATTGCGGGAAAAGGGGTCAACAGCC  
GTTTCAGTACCAAGTCTCAGGGGAAACTTTGAGATGGCCTTGCAAAGGGTATGGTAATAAGCTGACGGACATGGTCCTAACCACGCAGCC  
AAGTCCTAAGTCAACAGATCTTCTGTTGATATGGATGCAGTTCACAGACTAAATGTCGGTTCGGGGAAGATGTATTCTTCTCATAAGATA  
TAGTCGGACCTCTCCTTAATGGGAGCTAGCGGATGAAGTGATGCAACACTGGAGCCGCTGGGAACTAATTTGTATGCGAAAAGTATATTG  
ATTAGTTTTGGAGTACTCGTGGTCGTCAGACAGATGGACCGTACTCAGATATCGAGATGATGTGCGTGATGAGTACAGAGGAAGCAGAG  
TTCTCTCACGAGTGGACGACGGGTGAATGGAAAGTCGAGGTAAATTTTTGATAGTGAGGAGATATTGTTGGATTACGCTAGTCAAGTGGA  
ATCAGATTGGCCTTTAACTCACGGACAATTCTTTTCAATCTTACCGATCTATGATTCAGGTGGATATTTAGAAAAAGTTTACCAAACAG  
CAAAAAGTGTGGAGGCGCAAACGTTCCACGACGCGATATGTGCTTTGATTGTTGAGGAATTATTTGAATACGCTGGTAAGTGGCGAAAT  
ATTAGAGTTCAGGGTCCTACGACTTTCTTGCCTTCTTTAACTGTGCAAGTAGCGATGGCGGGAGCGATGTTGATTGGCTTGCACCATCG  
AATCTGTTACACGACTTCAGCGTCTGTATTAACGGAGGCTGTCAAGCAAAGTGACTTACCATCTGGATACGATCATTATGTCAATTTCG  
TAATGTCAGGTCAATTGAGTGATTCAGAAAAGTTGTTGGAGAGTTTGGAAAACCTTTTGGAACGGTATTTCAGGAATGGACGGAACGACAC  
GGCTATATAGTTGACGTGTCTAAGCGTATTCTTTTTTGACTCCTCTCTCACTCGAGATAACAGATACTTCGGTATCTGTTATCTGTTTT  
TTTTCAACAGATAGCCGCGTTTCGCGGGCTATCTGTTTTTTTTTATAACAATGCTTACTCCCGG

**Figure S1. Marker gene cassette of pKTM\_IAC.** T7 promoter is displayed in red type, *Pcap* promoter and ribosomal binding site is shown by blue type. *KTM* gene coding sequence is shown in yellow highlighting. Intron sequence is underlined. Bold font indicates T7hyb10 transcriptional terminator. Restriction sites flanking the expression cassette are shown by blue highlighting.

|              |     |                                                     |     |
|--------------|-----|-----------------------------------------------------|-----|
| KTM_ORIGINAL | 1   | ATGAATGGACCAATAATAATGACTAGAGAAGAAAGAATGAAGATTGTTCA  | 50  |
| KTM_MODIFIED | 1   | ATGAACGGACCGATTATAATGACTAGAGAAGAGCGTATGAAAATAGTACA  | 50  |
| KTM_ORIGINAL | 51  | TGAAATTAAGGAACGAATATTGGATAAATATGGGGATGATGTTAAGGCTA  | 100 |
| KTM_MODIFIED | 51  | TGAAATAAAAGAGA GAATATTAGACAAATATGGTGACGACGTGAAAGCTA | 100 |
| KTM_ORIGINAL | 101 | TTGGTGTATTATGGCTCTCTTGGTCGTGACTGATGGGCCCTATTCCGGAT  | 150 |
| KTM_MODIFIED | 101 | TTGGAGTGTATGGCTCTCTTGGTCGTGACAGATGGACCGTACTCAGAT    | 150 |
| KTM_ORIGINAL | 151 | ATTGAGATGATGTGTGTCATGTCAACAGAGGAAGCAGAGTTCAGCCATGA  | 200 |
| KTM_MODIFIED | 151 | ATCGAGATGATGTGCGTGATGAGTACAGAGGAAGCAGAGTTCCTCACGA   | 200 |
| KTM_ORIGINAL | 201 | ATGGACAACCGGTGAGTGGAAAGTGGAAAGTGAATTTTGATAGCGAAGAGA | 250 |
| KTM_MODIFIED | 201 | GTGGACGACGGTGAATGGAAAGTGGAGGTAAATTTTGATAGTGAGGAGA   | 250 |
| KTM_ORIGINAL | 251 | TTCTACTAGATTATGCATCTCAAGGTGGAATCAGATTGGCCGCTTACACAT | 300 |
| KTM_MODIFIED | 251 | TATTGTTGGATTACGCTAGTCAAGTGAATCAGATTGGCCTTAACTCAC    | 300 |
| KTM_ORIGINAL | 301 | GGTCAATTTTCTCTATTTTGCCGATTTATGATTCAGGTGGATACTTAGA   | 350 |
| KTM_MODIFIED | 301 | GGACAATCTTTCAATCTTACCGATCTATGATTCAGGTGGATATTAGA     | 350 |
| KTM_ORIGINAL | 351 | GAAAGTGTATCAAACCTGCTAAATCGGTAGAACCCAAACGTTCCACGATG  | 400 |
| KTM_MODIFIED | 351 | AAAAGTTACCAAACAGCAAAAAGTGTGGAGCGCAAACGTTCCACGACG    | 400 |
| KTM_ORIGINAL | 401 | CGATTTGTGCCCTTATCGTAGAAGAGCTGTTTGAATATGCAGGCAAATGG  | 450 |
| KTM_MODIFIED | 401 | CGATATGTGCTTTGATTGTTGAGGAATATTTGAATACGCTGGTAAGTGG   | 450 |
| KTM_ORIGINAL | 451 | CGTAATATTCGTGTGCAAGGACCGACAACATTTCTACCATCCTTGACTGT  | 500 |
| KTM_MODIFIED | 451 | CGAAATATTAGAGTTCAGGGTCTACGACTTCTTGCCCTTCTTAACTGT    | 500 |
| KTM_ORIGINAL | 501 | ACAGGTAGCAATGGCAGGTGCCATGTTGATTGGTCTGCATCATCGCATCT  | 550 |
| KTM_MODIFIED | 501 | GCAAGTAGCGATGGCGGGAGCGATGTTGATTGGCTTGCCATCGAATCT    | 550 |
| KTM_ORIGINAL | 551 | GTTATACGACGAGCGCTTCGGTCTTAACTGAAGCAGTTAAGCAATCAGAT  | 600 |
| KTM_MODIFIED | 551 | GTTACACGACTTCAGCGTCTGTATTACGGAGGCTGTCAAGCAAAGTGAC   | 600 |
| KTM_ORIGINAL | 601 | CTTCCTCAGGTTATGACCATCTGTGCCAGTTCGTAATGTCTGGTCAACT   | 650 |
| KTM_MODIFIED | 601 | TTACCATCTGGATACGATCATTTATGTCAATTCGTAATGTGAGTCAATT   | 650 |
| KTM_ORIGINAL | 651 | TTCCGACTCTGAGAACTTCTGGAATCGCTAGAGAATTTCTGGAATGGGA   | 700 |
| KTM_MODIFIED | 651 | GAGTGATTACAGAAAAGTTGTTGGAGAGTTTGAAAACCTTTTGGAACGGTA | 700 |
| KTM_ORIGINAL | 701 | TTCAGGAGTGGACAGAACGACACGGATATATAGTGGATGTGTCAAAACGC  | 750 |
| KTM_MODIFIED | 701 | TTCAGGAATGGACGGAACGACACGGCTATATAGTTGACGTGTCTAAGCGT  | 750 |
| KTM_ORIGINAL | 751 | ATACCATTTTGA                                        | 762 |
| KTM_MODIFIED | 751 | ATTCTTTTGA                                          | 762 |

**Figure S2. Alignment of native *KTM* gene coding sequence and synthetic *KTM* marker gene coding sequence.** Pipe character indicates bases that match between the two sequences, while a dot character indicates a mismatch. Key mismatches targeted by LNA modifications in RT-LAMP primers are shown in bold. F3 and B3 primer binding sites are shown by yellow highlighting. F2 and B2 domains of the FIP and BIP primers, respectively, are indicated with grey highlighting. The splice junction occurs between nucleotides shown in red. Alignment was produced using EMBOSS NEEDLE, with maximum gap opening and gap extension applied.

**CCTGCAGG**CTAGGAGGCAATTGTT**TAATACGACTCACTATAG**AGAGTTTGC~~AAAA~~TATACAGGGGATTATATATAATGGAAAAACAAGA  
AAGGAAAAATAGGAGGTTTTATCATATGGCATCTCAAGCTAAACAGACAGTCCATACTGGTAATACCGTAATGCTTATGATTAAGGT  
AAACCTGTAGGTAGAGCTCAATCAGCGTCTGGTACACGTTCTTACGGTACAGAAGGGGTATATGAGATTGGTTCTATCATGCCAC  
AAGAACACGTTTACCTTAAGTATGAAGGTGAATTAACAGTAGAACGTCTACGAATGAAAAAAGAGAAGTTTGC~~AAAA~~ATTAGGATA  
TGCTTCTCTTGGTGAAGAAATCCTTAAGAAAAGATATTATTGACATTGTTGTTATTGACAACCTTGACTAAAGAAGTGCTTGTGTCA  
TATCACGGTTGTAGTGCTAATAACTATGA**ACTTCGTAGCTTCACATAGTAATATGTGTCGAAAAACTTTCTAAACAGGGAAGCC**  
TAAGTCTATTAGATATGGTAATCCTGTGCTAAATCAGATTAATAATCTGTAAATGCCAAACGACTAACTGAAACCTACTTGATAA  
TTCAAGGGGAGTAAGTGTAGAGCCAAGCGGTAGAAGTTTTAAGTAATTATTATGTAAATCTTCTTTAAATCGAAAAGAAAAGAGT  
CCTTTTTTAGGATTGTGATATAGTCTGAACATATATGGAAACATATAGCAGTTCCTAGAGAACGGGCAGTGAGTAGCGACCACTG  
TTGAACATAATGGATGAAGCATGGAACACTAATGAAATAACTACTGAAAGC**AT**TC~~AAA~~AGGCGAAGAGTTGTT**CACGGGTGTTG**  
**TGCCGATCTTAGT**AGAATTGGATGGTGACGTTAACGGCCATAAATTTTTCTGTGCGAGGTGAAGGAGAGGGCGACGCGACTAACGG  
AAAATTGACATTAAAGTTCATTTGTACGACAGGTAAGTTGCCTGTTCCATGGCCTACTTTAGTGACGACGTTAACATACGGAGTC  
CAATGCTTCAGTCGTTATCCAGACCACATGAAGAGACACGACTTTTTCAAAGTGCTATGCCGGAAGGTTATGTACAAGAACGTA  
CAATTTCAATCAAAGATGACGGTACTTACAAAACAAGAGCTGAAGTGAATTCGAGGGCGACACTTTGGTGAATAGAATTGAGTT  
AAAAGGTATTGATTTCAAAGAGGATGGCAATATCTTAGGACATAAGTTAGAATACAATTTCAACTCACATAATGTGTACATCACT  
GCTGACAAACAGAAGAATGGTATCAAAGCAAATTTTAAGATAAGACATAACGTAGAAGATGGAAGTGTT**CAGTTAGCAGACCACT**  
ACCAGCAGAATACGCCAATCGGTGACGGACCTGTGTTGTTGCCGGATAATCACTATTTATCTACACAGTCAGTATTATCTAAGGA  
CCCGAACGAGAAACGTGACCACATGGTTTTATTGGAGTTTGTAAACAGCAGCTGGCATCACGCACGGCATGGACGAGTTGTACAAA  
**TAA**CTCCTCTCTCACTCGAGATAACAGATACTTCGGTATCTGTTATCTGTTTTTTTTTCAACAGATAGCCGCGTTCGCGCGGCTAT  
**CTGTTTTTTTTT**TATAACAATGCTTACT**CCCGG**

**Figure S3. Marker gene cassette of pOrf142+gfp\_mod.** T7 promoter is displayed in red type, *Pcap* promoter and ribosomal binding site is shown by blue type. *Orf142* gene coding sequence (first exon and first 22 bp of second exon) is shown in yellow highlighting. Intron sequence is underlined. Grey sequence indicates spacer to improve primer design characteristics against the transgene. GFP gene is shown with green highlighting, with ablated start codon indicated in lower case. Bold font indicates T7hyb10 transcriptional terminator. Restriction sites flanking the expression cassette are shown by blue highlighting.

**Table S1. Oligonucleotide sequences**

| Oligonucleotide function               | Primer name       | Primer sequence                                                          |
|----------------------------------------|-------------------|--------------------------------------------------------------------------|
| pKTM_IAC_v4 transgene RT-LAMP          | KTM_IAC_v4F3      | GAATATTAGACAAATATGGTGACG                                                 |
|                                        | KTM_IAC_v4FIP_LNA | TCGATATCTGAGTACGGTCCATCTACGTGAAAAGCTATTGGAGT+G*                          |
|                                        | KTM_IAC_v4BIP_LNA | CGTGATGAGTACAGAGGAAGCAGCCTCACTATCAAAATTTACCTC+G                          |
|                                        | KTM_IAC_v4B3_LNA  | TGACTAGCGTAATCCAACA+A                                                    |
|                                        | KTM_IAC_v4LB      | <b>ACCACACCTACCACCCTAATAACTAAGAGTGGACGACGGGTGAATG</b> †                  |
| Vector backbone DNA and RNA RT-LAMP    | ampF3_P1L1        | CCTTTTTTGCGGCATTTTGC                                                     |
|                                        | ampB3_P1L1        | CGACCGAGTTGCTCTTGC                                                       |
|                                        | ampFIP_P1L1       | TGCACCCAACCTGATCTTCAGCATCCTGTTTTTGCTCACCCAG                              |
|                                        | ampBIP_P1L1       | ATCCTTGAGAGTTTTCGCCCCGAATACCGCGCCACATAGC                                 |
|                                        | ampLB_P1L1        | <b>ACCAACACCTCACATCACACATAATAAGAACGTTTTCCAATGATGAGCACT</b>               |
| pOrf142+gfp_mod transgene RT-LAMP      | orf142_GFP_F3     | TGTTGTTATTGACAACCTTGACT                                                  |
|                                        | orf142_GFP_B3     | GTTAACGTCAACCATCCAATT                                                    |
|                                        | orf142_GFP_FIP    | CCTCGACGTTCCATGCTTCATGTGCTTGTGTCATATCACG                                 |
|                                        | orf142_GFP_BIP    | AGTGAGGAGATATTGTTGGATTACGTAAGATCGGCACAACACC                              |
|                                        | orf142_GFP_LB     | <b>ACCACACCTACCACCCTAATAACTAAGTTCAAAGGCGAAGAGTTGTTCA</b>                 |
| <i>P. aeruginosa</i> -specific RT-LAMP | PA_F3             | TACAGCGTCGCTCCCG                                                         |
|                                        | PA_B3             | TCGACACGCTTCCTCTACC                                                      |
|                                        | PA_FIP            | GCCACTGATCGTGGCGAAGACTGAGGGCGCGGAACA                                     |
|                                        | PA_BIP            | CTGACCTGGCGCAGGAAGAACTTGTGGACGGCGATGGTG                                  |
|                                        | PA_LF             | ACAACCCGGTGGTCTACAACA                                                    |
|                                        | PA_LB             | <b>ACCAACACCTCACATCACACATAATAGGTTGATCCGCTTGAACAGGC</b>                   |
| Transgene control fluorescent probe    | IAC UDP Probe     | /5' TEX 615/CCTGACCACTTCCGAACCCAACCACTACGACAGACCACACCTACCACCCTAATAACTAA‡ |
|                                        | IAC UDP Quencher  | CTGTCGTAGGTGGTTGGGTTCCGGAAGTGGTCAGG/3' Black Hole Quencher®-2/‡          |
| Diagnostic target fluorescent probe    | CoV UDP Probe     | /5' 6-FAM/CCATCAGCACCAAGACTACCCACCTCGCCACCAAACCAACACCTCACATCACACATAATA‡  |
|                                        | CoV UDP Quencher  | TTGGTGGCGAGGTGGGTAGTCTTGGTGCTGATGG/3' Iowa Black® FQ/‡                   |

\* Plus sign precedes LNA-modified bases

† Bold font indicates homology tails between loop primers and probes

‡ Sequence from Panpradist, N. *et al. Sci Adv* 7, eabj1281 (2021)
